# Supplementary material
Source: Elsevier journal article supplement (https://www.sciencedirect.com/science/article/pii/S0014256522001333)
Supplement: mmc1 [file S0014256522001333:mmc1.pdf]

## Anexo 1. Variables incluidas en la encuesta realizada por el Comité de Ética para la Asistencia Sanitaria del Hospital Universitario de la Princesa (versión 2021)

### 1. DATOS DEMOGRÁFICOS:

- Te identificas como: Hombre / Mujer / Otros
- ¿Cuántos años tienes? .....
- ¿Cuál es tu trabajo en el Hospital Universitario de La Princesa?
  - Medicina (cualquiera que sea su categoría)
  - Médico Residente
  - Trabajo Social
  - Enfermería
  - Fisioterapia
  - Técnico / Auxiliar de Enfermería
  - No asistencial
  - Personal administrativo
  - Otro Personal (especificar) .....

### 2. SOBRE EL CEAS:

- ¿Sabías que existe un **Comité de Ética para la Asistencia Sanitaria** (CEAS) en el H. U. La Princesa?
  - Sí
  - No
- ¿Qué función crees que tiene el CEAS? (*Se puede marcar más de una*)
  - Consultiva y orientadora
  - Formativa
  - Sancionadora de conductas
- ¿Has consultado alguna vez al CEAS?
  - Sí
  - No, pero alguna vez me lo he planteado
  - No, nunca me lo he planteado
- Si la respuesta es negativa, ¿qué factor/es crees que han influido? (*Es posible señalar más de una respuesta*)
  - No lo he necesitado
  - Falta de conocimiento del procedimiento
  - No podía esperar a la deliberación-resolución para tomar una decisión
  - No estaba seguro/a de que fuese realmente un conflicto ético
  - Implicación de otros profesionales
  - No era el responsable del caso
- Si la respuesta es positiva, ¿te ha sido útil?
  - Sí
  - No

- ¿Sabías que el CEAS ofrece desde hace un año un **Servicio de Consultoría en Ética Clínica (CEC)** en el H. U. La Princesa?
  - Sí
  - No
- ¿Qué función crees que tiene el CEC?
  - Consultiva y orientadora
  - Formativa
  - Sancionadora de conductas
- ¿Has usado alguna vez el servicio de CEC?
  - Sí
  - No, pero alguna vez me lo he planteado
  - No, nunca me lo he planteado
- Si la respuesta es negativa, ¿qué factor/es crees que han influido? (*Es posible señalar más de una respuesta*)
  - No lo he necesitado
  - Falta de conocimiento del procedimiento
  - No podía esperar a la deliberación-resolución para tomar una decisión
  - No estaba seguro/a de que fuese realmente un conflicto ético
  - Implicación de otros profesionales
  - No era el responsable del caso
- Si la respuesta es positiva, ¿te ha sido útil la interconsulta?
  - Sí, para la resolución del caso
  - Sí, para aumentar mi conocimiento respecto a un problema ético concreto
  - Sí, para aprender a abordar un problema ético de forma estructurada
  - No, no ha sido útil
- ¿Volverías a solicitar una interconsulta al CEC ante otro conflicto ético?
  - Sí
  - No
- ¿Crees que un servicio de interconsulta como el CEC debería estar disponible en horario 24/7 (24 h todos los días de la semana)?
  - Sí
  - No
- ¿Qué otros aspectos del proceso de interconsulta de ética clínica te gustaría mejorar? (*Texto libre*)

### **3. SOBRE LOS PROBLEMAS ÉTICO-ASISTENCIALES:**

- ¿Te enfrentas a problemas éticos en tu práctica cotidiana?
  - Frecuentemente
  - Ocasionalmente
  - Nunca

- En caso de responder positivamente, ¿en qué consisten estos problemas? (*Es posible señalar más de una respuesta*)
  - Limitación del esfuerzo terapéutico
  - Comunicación con paciente
  - Comunicación con familiares
  - Comunicación con otros profesionales
  - Confidencialidad – intimidad
  - Rechazo de tratamiento
  - Dificultad de interpretación de voluntades anticipadas
  - Problemas sobre el proceso de consentimiento informado
  - Competencia a la hora de tomar decisiones
  - Dificultad de tomar decisiones con familiares/representantes
  - Dificultad para identificar los valores / preferencias más relevantes del paciente
  - Toma de decisiones en situaciones de recursos limitados
  - Problemas en relación con contenciones mecánicas
  - Pacientes no representados
  
- Si no has solicitado una consulta formal al Servicio de CEC, ¿cómo resolviste el/los conflictos?
  - Tengo criterio suficiente
  - Consulto a otros compañeros
  - Como puedo
  
- ¿Crees que tu percepción acerca de posibles conflictos éticos ha cambiado a lo largo de 2020 como consecuencia de la pandemia COVID-19?
  - Sí
  - No
  
- En caso de haber respondido favorablemente, ¿de qué manera lo ha hecho?
  - Soy más consciente de que existen problemas éticos en nuestra práctica diaria
  - Me he dado cuenta de la necesidad de solicitar ayuda para la resolución de problemas éticos
  - Me he dado cuenta de la necesidad de aumentar mi formación específica en ética clínica
  - He aumentado mi formación en ética clínica
  - Otros
  
- ¿Cuál de los siguientes problemas éticos te parece que ha sido especialmente relevante durante la pandemia COVID-19 (en caso de que te hayas enfrentado a ellos)? (*Es posible señalar más de una respuesta*)
  - Limitación del esfuerzo terapéutico
  - Comunicación con paciente
  - Comunicación con familiares
  - Comunicación con otros profesionales
  - Confidencialidad – intimidad
  - Rechazo de tratamiento

- Dificultad de interpretación de voluntades anticipadas
- Problemas sobre el proceso de consentimiento informado
- Competencia a la hora de tomar decisiones
- Dificultad de tomar decisiones con familiares/representantes
- Dificultad para identificar los valores / preferencias más relevantes del paciente
- Toma de decisiones en situaciones de recursos limitados
- Problemas en relación con contenciones mecánicas
- Pacientes no representados

#### **4. SOBRE LA FORMACIÓN EN BIOÉTICA:**

- ¿En la actualidad, cómo consideras que son tus conocimientos y habilidades en Bioética?
  - Extensos
  - Suficientes para mi práctica diaria
  - Escasos
- Consideras que la formación en Bioética es:
  - Imprescindible
  - Necesaria
  - Útil
  - Innecesaria
- De las siguientes frases, ¿cuál o cuáles consideras que describen mejor tu relación con la Bioética? *(Numera por orden de importancia, del 1 [más importante] al 4 [menos importante])*
  - Me ofrece o puede proporcionarme una metodología de trabajo útil para abordar problemas éticos en la práctica sanitaria.
  - Puede ayudarme a sortear problemas legales relacionados con decisiones clínicas.
  - Su misión es proteger al paciente y su familia de los posibles errores en el Sistema Nacional de Salud.
  - Es una disciplina importante a la que se dedican profesionales sanitarios que ayudan a resolver problemas conflictivos en el ámbito de la salud.
- ¿Estarías interesado en mejorar tu formación en Bioética? *(Numera por orden de importancia, del 1 [más importante] al 4 [menos importante])*
  - Sí, y estaría dispuesto a sacar tiempo para cursos o programas formativos.
  - Sí, aunque no es una de mis prioridades en este momento.
  - No, creo que antes hay mucho que hacer o aprender de otras materias.
  - Nunca me había planteado esta pregunta.

#### **5. POR FAVOR, ANOTA ALGUNAS SUGERENCIAS O PROPUESTAS:**

- En mi especialidad, área de trabajo, equipo asistencial o unidad, considero urgente /necesario que se aborden desde el punto de vista ético los siguientes asuntos: *(Espacio libre)*
- Creo que se podría mejorar la relación entre los profesionales del hospital y el CEAS mediante ... *(Espacio libre)*
